# Supplementary material
Source: HighWire-hosted journal article supplement (https://heart.bmj.com/content/106/13/992)
Supplement: inline-supplementary-material-1 [file inline-supplementary-material-1.pdf]

**Global longitudinal strain by diagnosis**

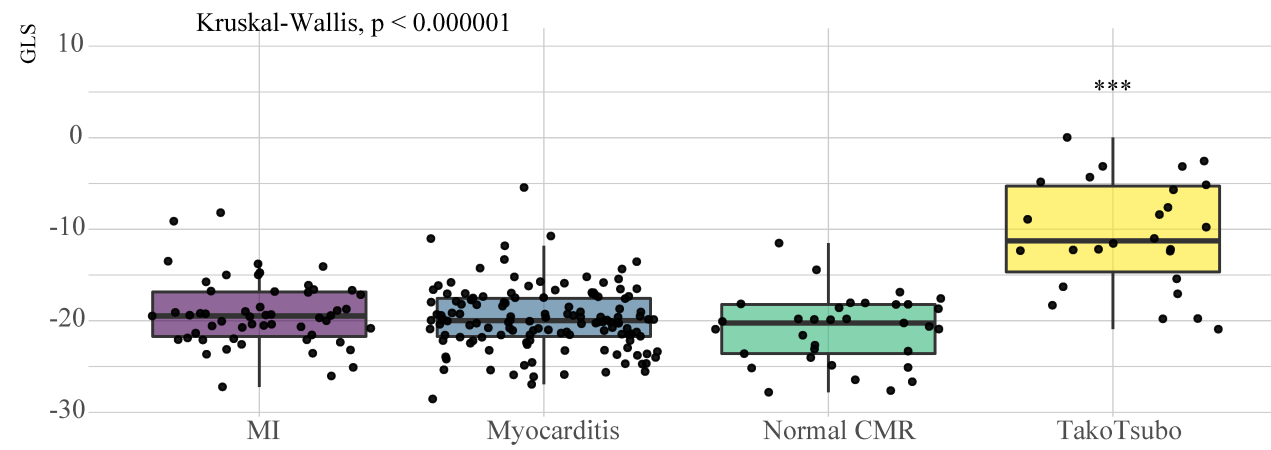

**Longitudinal mechanical dispersion by diagnosis**

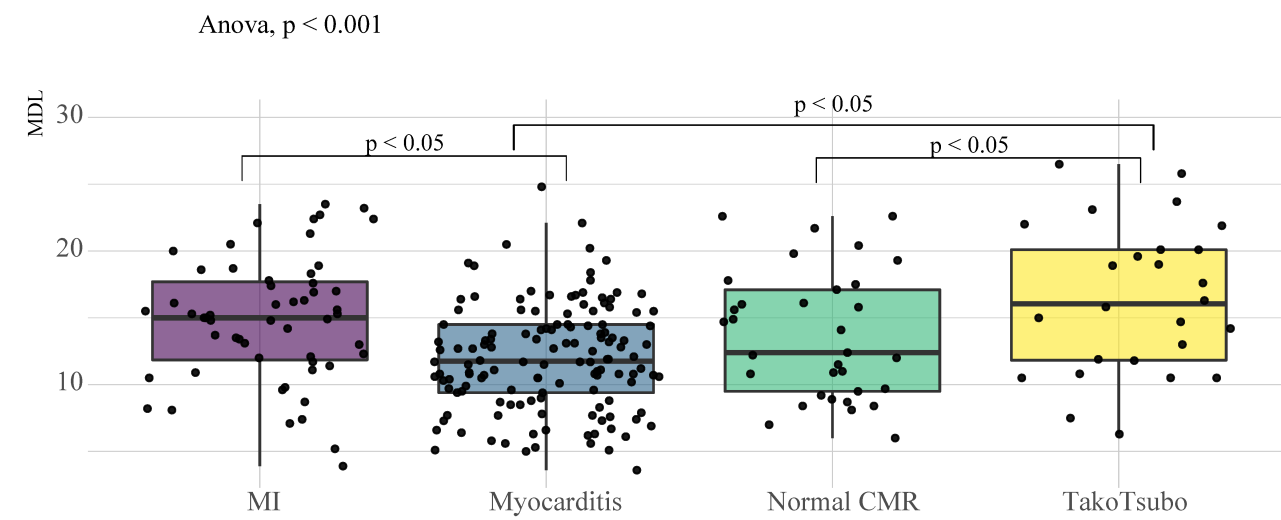

**Global circumferential strain by diagnosis**

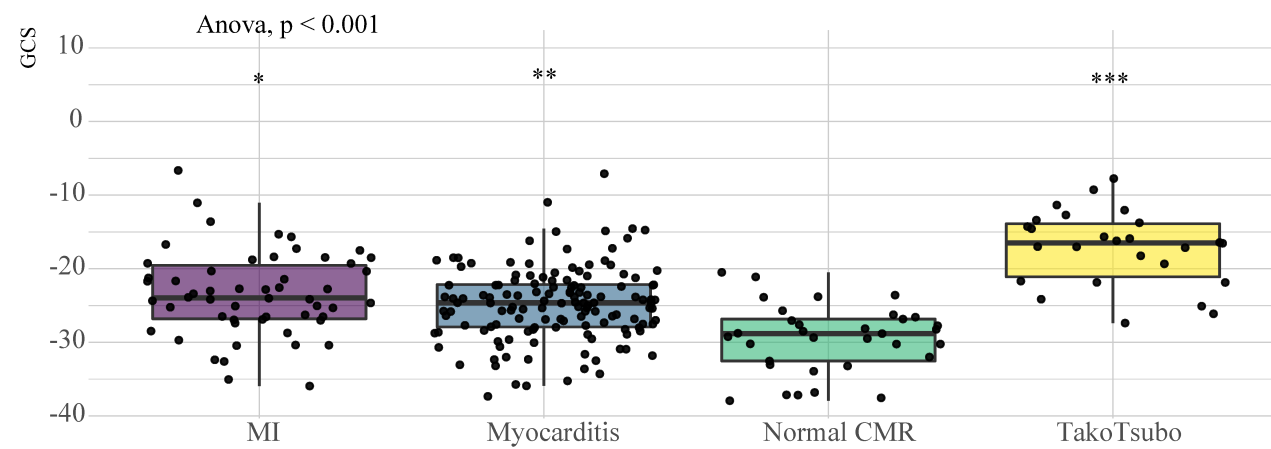

**Circumferential mechanical dispersion by diagnosis**

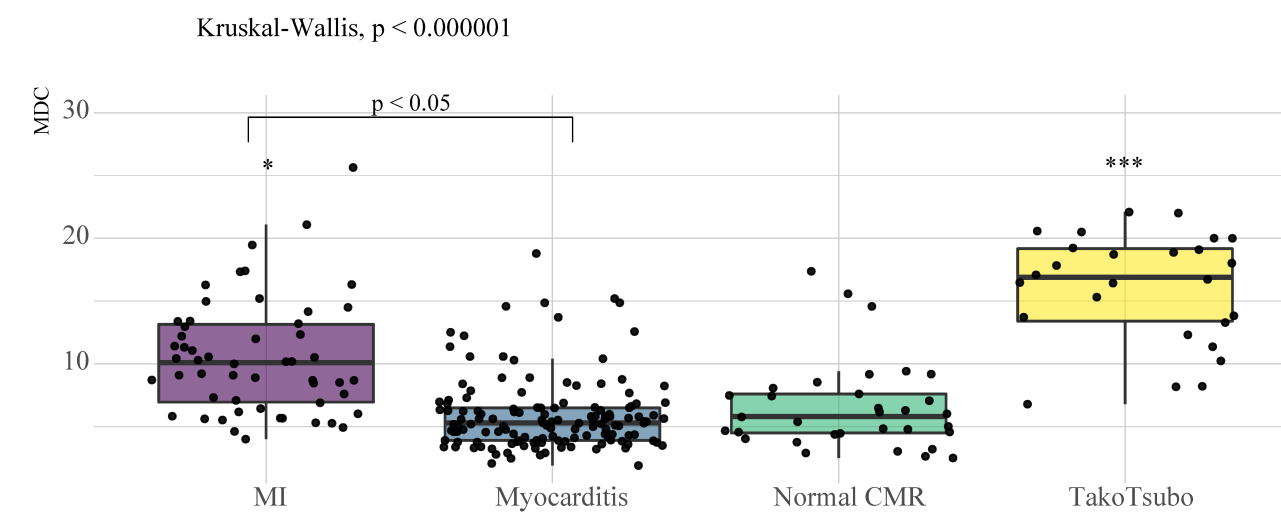

**Global radial strain by diagnosis**

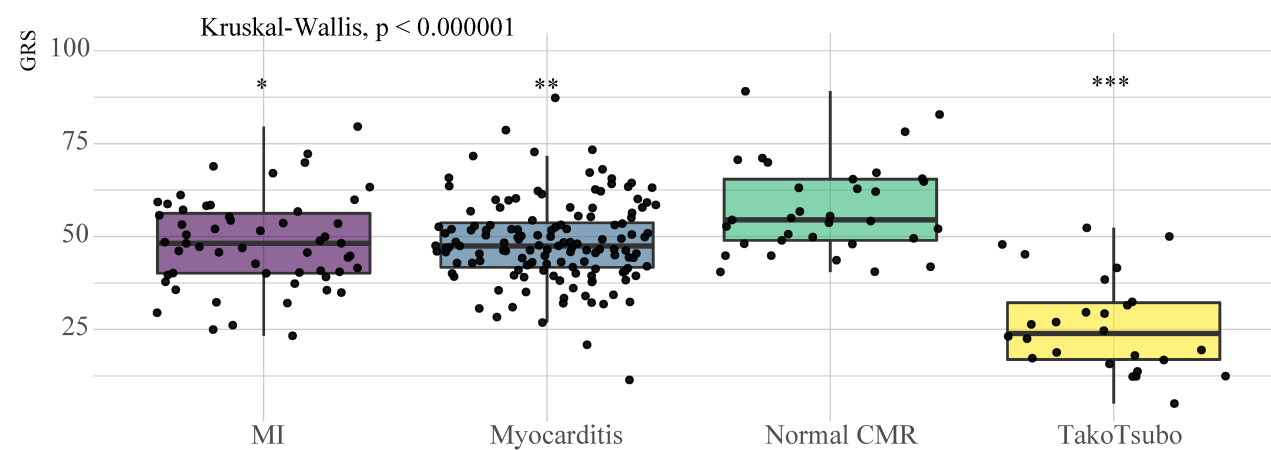

**Diagnosis**

-  Myocardial infarction
-  Myocarditis
-  Normal CMR
-  Tako-tsubo cardiomyopathy

Results of the pairwise comparison:

- \*: Difference between MI vs. Normal CMR ( $p < 0.05$ )
- \*\* : Difference between Myocarditis vs. Normal CMR ( $p < 0.05$ )
- \*\*\*: Difference between TakoTsubo vs. MI, Myocarditis and Normal CMR ( $p < 0.05$ )

Supplement 1. Pairwise comparison of global strain values
